# Supplementary material for: Enterovirus 71 infection in children with hand, foot, and mouth disease in Shanghai, China: epidemiology, clinical feature and diagnosis
Source: PubMed Central journal article supplement (PMC4464242; doi:10.1186/s12985-015-0308-2), 2015-06-03
Supplement: 12985_2015_308_MOESM1_ESM.pdf [file 12985_2015_308_MOESM1_ESM.pdf]

## Additional file 1

**Table S1. The list of EV71 strains used for phylogenetic analysis in this study.**

| <b>Strain</b>           | <b>Source</b> | <b>GenBank no.</b> | <b>Genotype</b> |
|-------------------------|---------------|--------------------|-----------------|
| <b>P013/SH/CHN/2012</b> | This study    | KJ139450           | C4a             |
| <b>P015/SH/CHN/2012</b> | This study    | KJ159896           | C4a             |
| <b>P045/SH/CHN/2012</b> | This study    | KJ159894           | C4a             |
| <b>P130/SH/CHN/2012</b> | This study    | KJ159895           | C4a             |
| <b>P186/SH/CHN/2012</b> | This study    | KJ159897           | C4a             |
| <b>P305/SH/CHN/2012</b> | This study    | KJ159898           | C4a             |
| <b>P323/SH/CHN/2012</b> | This study    | KJ159900           | C4a             |
| <b>P359/SH/CHN/2012</b> | This study    | KJ159899           | C4a             |
| <b>P395/SH/CHN/2012</b> | This study    | KJ159901           | C4a             |
| <b>C002/SH/CHN/2011</b> | This study    | KJ188634           | C4a             |
| <b>C011/SH/CHN/2011</b> | This study    | KJ188629           | C4a             |
| <b>C013/SH/CHN/2011</b> | This study    | KJ188628           | C4a             |
| <b>C014/SH/CHN/2011</b> | This study    | KJ188627           | C4a             |
| <b>C019/SH/CHN/2011</b> | This study    | KJ188630           | C4a             |
| <b>C032/SH/CHN/2011</b> | This study    | KJ188631           | C4a             |
| <b>C040/SH/CHN/2011</b> | This study    | KJ188635           | C4a             |
| <b>C045/SH/CHN/2011</b> | This study    | KJ188636           | C4a             |
| <b>C046/SH/CHN/2011</b> | This study    | KJ188633           | C4a             |
| <b>C052/SH/CHN/2011</b> | This study    | KJ188626           | C4a             |
| <b>C055/SH/CHN/2011</b> | This study    | KJ188625           | C4a             |
| <b>C057/SH/CHN/2011</b> | This study    | KJ188624           | C4a             |
| <b>C058/SH/CHN/2011</b> | This study    | KJ188623           | C4a             |
| <b>C059/SH/CHN/2011</b> | This study    | KJ188632           | C4a             |
| <b>C063/SH/CHN/2011</b> | This study    | KJ188640           | C4a             |
| <b>C068/SH/CHN/2011</b> | This study    | KJ188639           | C4a             |

|                               |            |          |     |
|-------------------------------|------------|----------|-----|
| <b>C070/SH/CHN/2011</b>       | This study | KJ188638 | C4a |
| <b>C077SH/CHN/2011</b>        | This study | KJ188637 | C4a |
| <b>C080/SH/CHN/2011</b>       | This study | KJ188642 | C4a |
| <b>C082/SH/CHN/2011</b>       | This study | KJ188641 | C4a |
| <b>242/TW/1986</b>            | GenBank    | JN874548 | B1  |
| <b>18_08/AH/CHN/2008</b>      | GenBank    | GQ121427 | C4a |
| <b>07124/SD/CHN/2007</b>      | GenBank    | JQ326299 | C4a |
| <b>GD/CHN/2009</b>            | GenBank    | JF799986 | C4a |
| <b>10-38349/SH/CHN/2008</b>   | GenBank    | JQ766173 | C4a |
| <b>TC24F/SD/CHN/2007</b>      | GenBank    | EU753418 | C4a |
| <b>17/YN/CHN/2010</b>         | GenBank    | JN251929 | C4a |
| <b>SHAPHC571T/SH/CHN/2010</b> | GenBank    | JF918576 | C4a |
| <b>623/SD/CHN/2010</b>        | GenBank    | HQ668404 | C4a |
| <b>SHAPHC581F/SH/CHN/2010</b> | GenBank    | JF918578 | C4a |
| <b>650/GD/CHN/2008</b>        | GenBank    | HM037808 | C4a |
| <b>AS17/GZ/CHN/2011</b>       | GenBank    | JX203260 | C4a |
| <b>583/GD/CHN/2008</b>        | GenBank    | HM037805 | C4a |
| <b>LY10108/SD/CHN/2009</b>    | GenBank    | KF853532 | C4a |
| <b>H1261F/SD/CHN/2008</b>     | GenBank    | GQ253399 | C4a |
| <b>H419F/SD/CHN/2008</b>      | GenBank    | GQ253394 | C4a |
| <b>SHAPHC59T/SH/CHN/2008</b>  | GenBank    | HM579943 | C4a |
| <b>SHAPHC44T/SH/CHN/2008</b>  | GenBank    | HM579942 | C4a |
| <b>1231/HN/CHN/2011</b>       | GenBank    | HQ668453 | C4a |
| <b>BrCr/USA/1970</b>          | GenBank    | JN874547 | A   |
| <b>1/Anhui/CHN/2009</b>       | GenBank    | GQ994988 | C4a |
| <b>ZH-ETC385/GD/CHN/2009</b>  | GenBank    | GQ487686 | C4a |
| <b>ZH-JC426/GD/CHN/2009</b>   | GenBank    | GQ487689 | C4a |
| <b>18/Henan/CHN/2009</b>      | GenBank    | KM288747 | C4a |
| <b>20/Henan/CHN/2009</b>      | GenBank    | KM288749 | C4a |

|                                |         |          |     |
|--------------------------------|---------|----------|-----|
| <b>ZB0002F/SD/CHN/2009</b>     | GenBank | GQ253419 | C4a |
| <b>RZ0010F/SD/CHN/2009</b>     | GenBank | GQ253417 | C4a |
| <b>118/SH/CHN/2009</b>         | GenBank | HQ667787 | C4a |
| <b>27/SH/CHN/2009</b>          | GenBank | HQ667783 | C4a |
| <b>23/KM/CHN/2009</b>          | GenBank | JF505392 | C4a |
| <b>16/KM/CHN/2009</b>          | GenBank | JF505391 | C4a |
| <b>Y90-3205/JPN/1990</b>       | GenBank | AB433863 | B2  |
| <b>1011561/GZ/CHN/2010</b>     | GenBank | KJ865523 | C4a |
| <b>109834/GZ/CHN/2010</b>      | GenBank | KJ865517 | C4a |
| <b>1938/HN/CHN/2010</b>        | GenBank | KM260010 | C4a |
| <b>1981/HN/CHN/2010</b>        | GenBank | KM260011 | C4a |
| <b>26M-AUS-2/AUS/1999</b>      | GenBank | AF376101 | B3  |
| <b>183/YN/CHN/2010</b>         | GenBank | AB725679 | C4a |
| <b>176/YN/CHN/2010</b>         | GenBank | AB725678 | C4a |
| <b>H07/Anhui/CHN/2011</b>      | GenBank | HQ328793 | C4a |
| <b>H06/Anhui/CHN/2011</b>      | GenBank | HQ328792 | C4a |
| <b>E59/TW/2002</b>             | GenBank | JN874551 | B4  |
| <b>FS-882/GD/CHN/2011</b>      | GenBank | KC801034 | C4a |
| <b>FS-886/GD/CHN/2011</b>      | GenBank | KC801033 | C4a |
| <b>533/HN/CHN/2011</b>         | GenBank | KM260020 | C4a |
| <b>512/HN/CHN/2011</b>         | GenBank | KM260019 | C4a |
| <b>202/LY/CHN/AM/2011</b>      | GenBank | KF150174 | C4a |
| <b>11475C4/SD/CHN/2011</b>     | GenBank | KJ772432 | C4a |
| <b>EV1945/Kuching/MAL/2009</b> | GenBank | HM358835 | B5  |
| <b>FL031T/AH/CHN/2012</b>      | GenBank | KF925272 | C4a |
| <b>FL028T/AH/CHN/2012</b>      | GenBank | KF925271 | C4a |
| <b>1213845/GZ/CHN/2012</b>     | GenBank | KJ865525 | C4a |
| <b>127583/GZ/CHN/2012</b>      | GenBank | KJ865520 | C4a |
| <b>1576/Henan/CHN/2012</b>     | GenBank | KM260024 | C4a |

|                             |         |          |     |
|-----------------------------|---------|----------|-----|
| <b>1571/Henan/CHN/2012</b>  | GenBank | KM260022 | C4a |
| <b>96200/SD/CHN/1996</b>    | GenBank | JQ326306 | C2  |
| <b>97-56/HLJ/CHN/1997</b>   | GenBank | AB115494 | C3  |
| <b>JP38/Sm/W/JPN/2000</b>   | GenBank | HQ676217 | C1  |
| <b>SB12007-SAR/MAS/2003</b> | GenBank | AY905548 | B5  |
| <b>4F-4/AUS/1999</b>        | GenBank | AF376105 | B3  |
| <b>2027/SIN/2001</b>        | GenBank | JQ766153 | B4  |
| <b>8M-6/AUS/1999</b>        | GenBank | AF376109 | C2  |
| <b>2952/USA/1981</b>        | GenBank | AF135888 | B2  |
| <b>933V/VNM/2005</b>        | GenBank | AM490161 | C5  |
| <b>03/KOR/2000</b>          | GenBank | DQ341356 | C3  |
| <b>6910/USA/1987</b>        | GenBank | AF135901 | B1  |
| <b>962T/VNM/2005</b>        | GenBank | AM490162 | C5  |
| <b>SB9508-SAR/MAS/2003</b>  | GenBank | AY258301 | C1  |
| <b>SHZH98/CHN/1998</b>      | GenBank | AF302996 | C4b |
| <b>SHZH04-3/CHN/2004</b>    | GenBank | AY895142 | C4b |
